# Supplementary material for: Microsolvation of Zn cations: infrared multiple photon dissociation spectroscopy of Zn+(H2O)n (n = 2–35)
Source: Royal Society of Chemistry journal article supplement (doi:10.1039/d0cp06112c), 2021-01-01
Supplement: d0cp06112c1.pdf [file d0cp06112c1.pdf]

## Supporting Information

### Microsolvation of Zn cations: Infrared spectroscopy of hydrated $\text{Zn}^+(\text{H}_2\text{O})_n$ complexes ( $n = 2-35$ )

Ethan M. Cunningham, Thomas Taxer, Jakob Heller, Milan Ončák, Christian van der Linde, and Martin K. Beyer\*

Institut für Ionenphysik und Angewandte Physik, Universität Innsbruck, Technikerstraße 25, 6020 Innsbruck, Austria

Corresponding author: [martin.beyer@uibk.ac.at](mailto:martin.beyer@uibk.ac.at)

#### Contents

|                                                        |    |
|--------------------------------------------------------|----|
| Calculating IRMPD cross sections .....                 | 2  |
| Calculated $\text{H}_2\text{O}$ Binding Energies ..... | 3  |
| Calculated Structures .....                            | 4  |
| References .....                                       | 14 |

## Calculating IRMPD cross sections

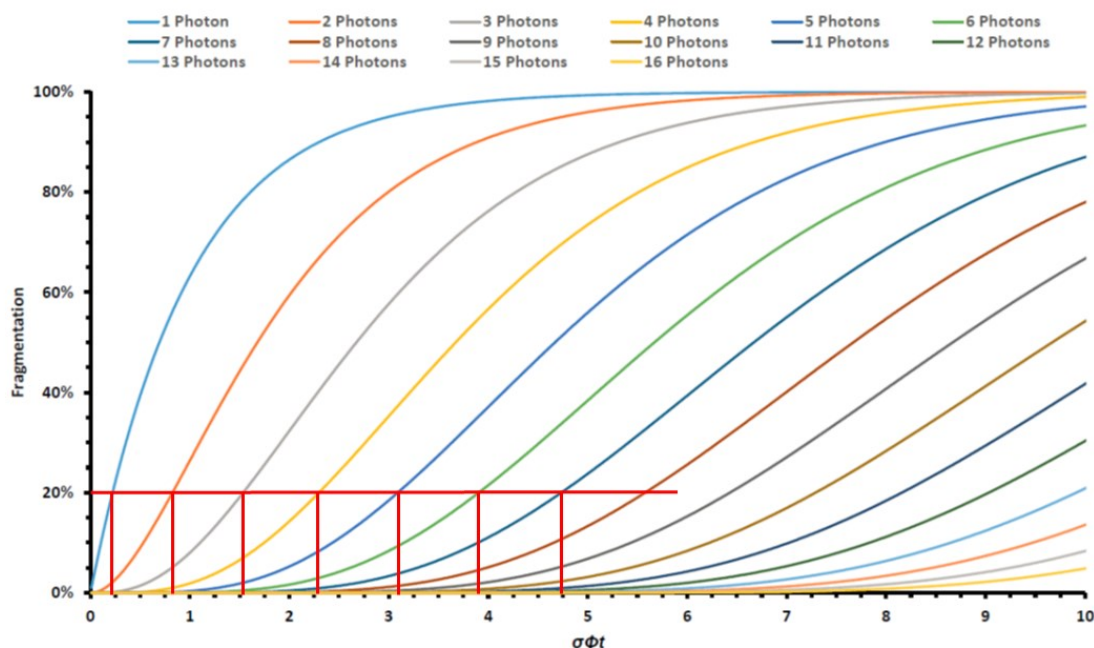

**Figure S1.** Quantitative analysis of multiphoton absorption, each curve representing  $k$  photons ( $k = 1-16$ ) with the fragmentation yield (%) and  $\sigma\Phi t$ .

As outlined in previous publications,<sup>1,2</sup> infrared multi-photon photodissociation cross sections are calculated assuming consecutive first-order reactions, the kinetics of photon absorption is shown in Figure S1. Using Figure S1, along with the fragmentation yield after absorption of the  $k^{\text{th}}$  photon, the value of  $\sigma\Phi t$  can be readily obtained. By way of example, the values of  $\sigma\Phi t$  are shown for 1-7 photons, assuming a 20% fragmentation yield. The photon flux,  $\Phi$ , is measured using a power meter,  $t$  is controlled using the LabView software, thus the cross section,  $\sigma$ , can be calculated from  $\sigma\Phi t$ .

The number of photons required to dissociate a water molecule ranges from one to two, details of which is found in previous publications.<sup>1,2</sup> For all cluster sizes, photodissociation leading to loss of water molecules was found to be the only photofragment channel. To account for laser energy and irradiation time, single-photon cross sections,  $\sigma$ , are calculated using a modified Beer-Lambert equation, details are outlined in the experimental section of the main article.

## Calculated H<sub>2</sub>O Binding Energies

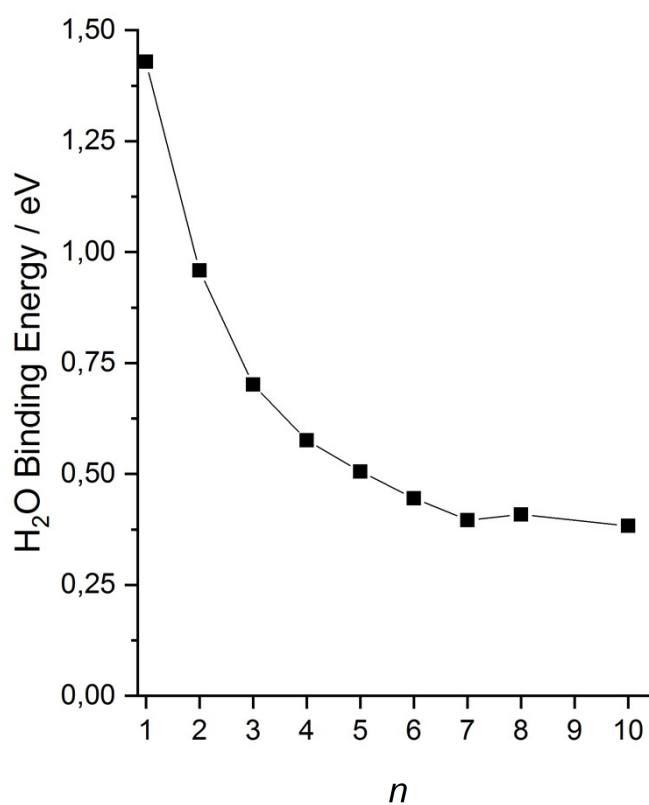

**Figure S2.** Ligand binding energies of Zn<sup>+</sup>(H<sub>2</sub>O)<sub>n</sub> clusters ( $n = 1-10$ ) calculated at the B3LYP/aug-cc-pVDZ level of theory. Binding energies are calculated:  $E[\text{Zn}^+(\text{H}_2\text{O})_n] - E[\text{Zn}^+(\text{H}_2\text{O})_{n-1}] - E[(\text{H}_2\text{O})]$  including zero-point correction, assuming a coordination number of 3 for all clusters where  $n \geq 3$ .

## Calculated Structures

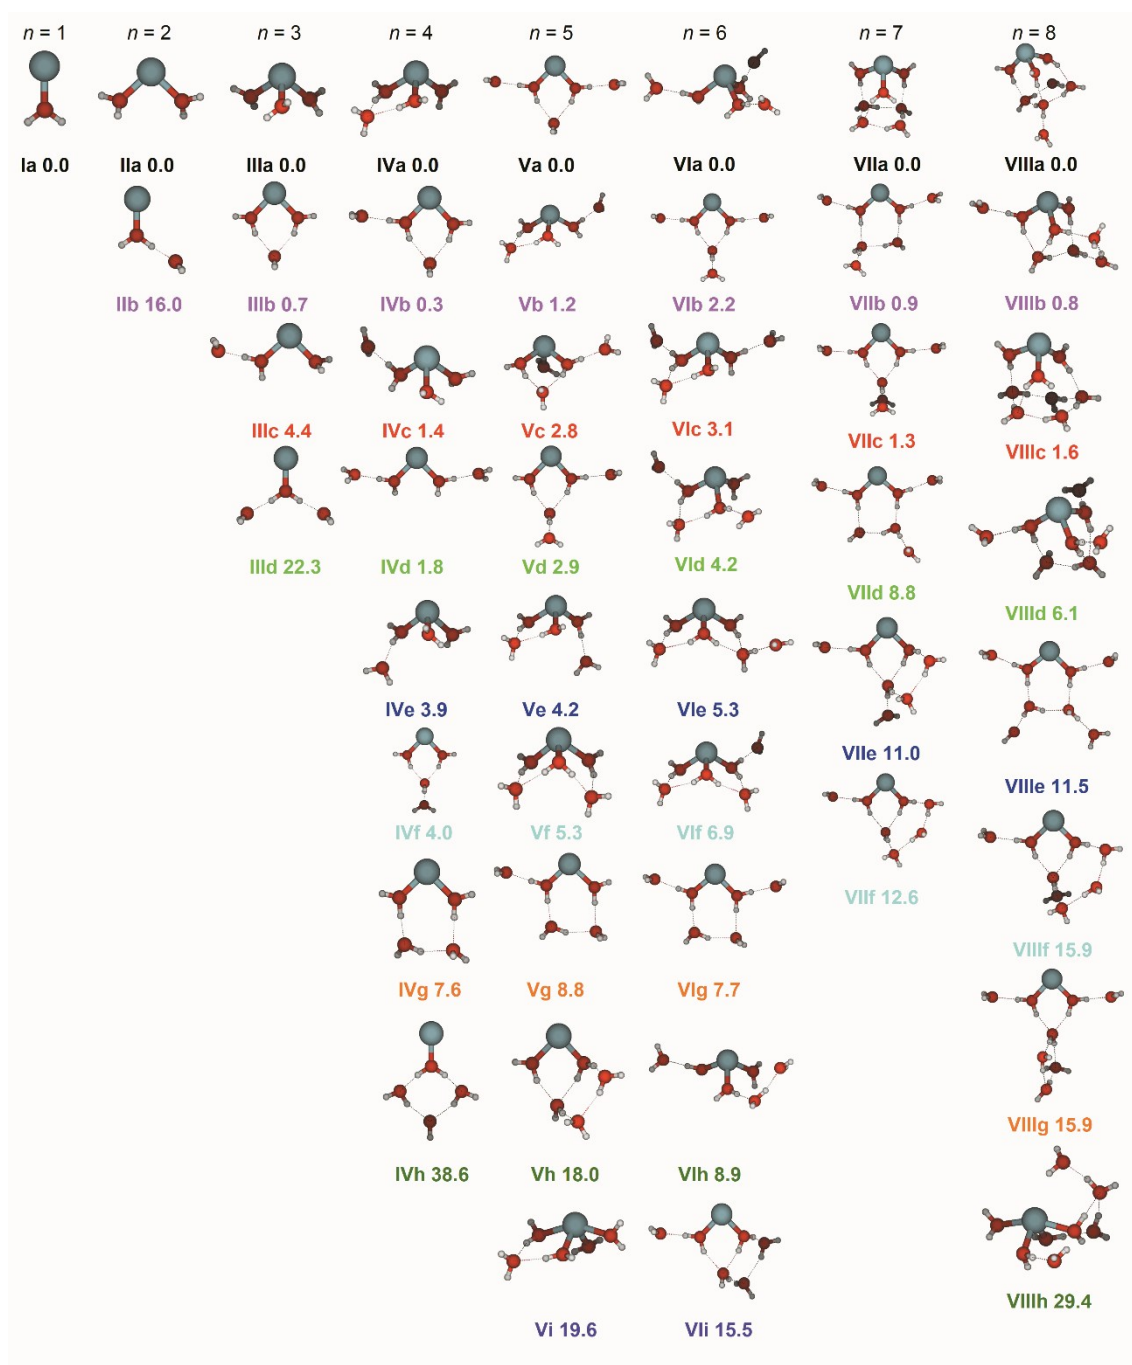

**Figure S3.** Low-lying isomers of  $\text{Zn}^+(\text{H}_2\text{O})_n$  clusters ( $n = 1-8$ ) calculated at the B3LYP/aug-cc-pVDZ level of theory along with relative energy given in  $\text{kJ mol}^{-1}$  inclusive of zero-point energy.

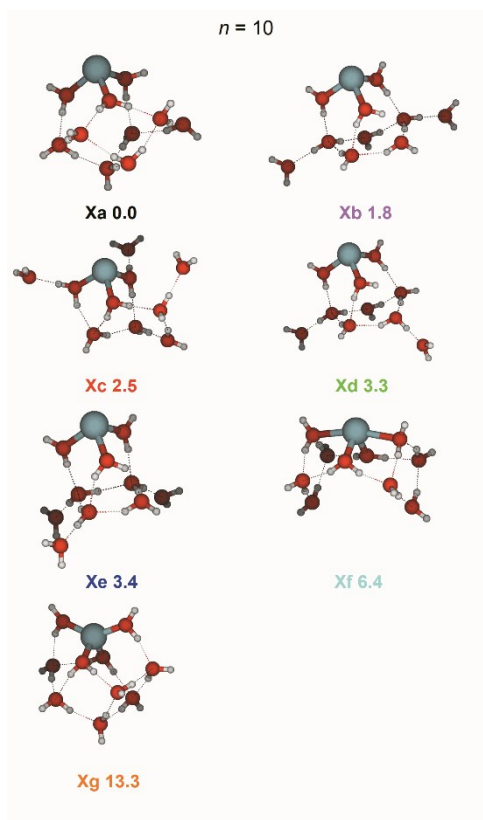

**Figure S4.** Low-lying isomers of the  $Zn^+(H_2O)_{10}$  cluster calculated at the B3LYP/aug-cc-pVDZ level of theory along with relative energy given in  $\text{kJ mol}^{-1}$  inclusive of zero-point energy.

Cartesian coordinates (in Å) and electronic energies (in Hartree), inclusive of zero-point energy, for Zn<sup>+</sup>(H<sub>2</sub>O)<sub>n</sub> clusters (n = 1-10) optimised at the B3LYP/aug-cc-pVDZ level of theory.

**Ia**  
-1855.620360  
H 0.785918 -2.084069 0.000000  
O 0.000007 -1.513340 0.000000  
H -0.786192 -2.083688 0.000000  
Zn 0.000007 0.542483 0.000000  
O 0.312155 -1.440163 -0.001258  
H 3.273711 -0.000863 0.771512  
H 3.277210 0.001875 -0.767727  
H 1.262073 -1.196532 -0.001847  
H 0.219090 -2.402172 0.000341  
H 0.216833 2.402701 -0.002127  
H 1.262088 1.199417 0.000017

**IIa**  
-1932.078999  
O -1.553704 0.849674 0.021610  
Zn -0.000310 -0.599483 0.000054  
O 1.554253 0.849097 -0.021616  
H -2.455405 0.622010 0.297306  
H -1.629112 1.578635 -0.614351  
H 1.635801 1.571910 0.620601  
H 2.453633 0.621769 -0.305117

**IIb**  
-1932.072916  
O 0.539390 0.812983 0.000074  
Zn -1.189757 -0.164186 -0.000003  
O 2.815099 -0.358396 -0.000045  
H 0.621871 1.777652 -0.000495  
H 1.463499 0.388917 -0.000098  
H 3.386043 -0.439165 -0.776133  
H 3.385391 -0.438534 0.776590

**IIIa**  
-2008.528176  
O 1.756643 0.156696 0.626608  
Zn 0.000517 0.000363 -0.651096  
O -1.015158 1.442259 0.625994  
H 2.643860 -0.012562 0.275392  
H 1.838957 0.911063 1.230142  
H -1.311688 2.295484 0.274916  
H -1.711014 1.135615 1.227536  
O -0.743077 -1.600000 0.625110  
H -1.331098 -2.284999 0.272710  
H -0.131778 -2.047139 1.230480

**IIIb**  
-2008.527924  
O 2.687116 -0.000291 0.000551  
O 0.311617 1.440846 -0.000754  
Zn -1.199937 -0.000252 0.000384

**IIIc**  
-2008.526503  
O 0.846206 0.572039 -0.619298  
Zn -0.724084 -0.610037 0.002686  
O -2.055107 1.024646 0.253869  
H 0.919819 0.863872 -1.539512  
H 1.776053 0.403096 -0.282588  
H -1.789142 1.947367 0.384361  
H -2.980093 0.943996 0.529860  
O 3.232835 0.139406 0.355572  
H 3.756679 0.814502 0.806375  
H 3.847727 -0.560447 0.099780

**IIId**  
-2008.519699  
O -0.488174 0.000000 -0.000096  
Zn 1.463552 -0.000037 0.000011  
O -1.811128 2.256992 -0.000024  
O -1.811237 -2.256934 0.000062  
H -1.047296 -0.829107 -0.000053  
H -1.047224 0.829151 -0.000044  
H -2.232534 -2.653661 0.773725  
H -2.231673 -2.654316 -0.773732  
H -2.232261 2.654040 -0.773610  
H -2.231264 2.654537 0.773849

**IVa**  
-2084.972758  
O 3.001311 0.022956 0.285690  
O 0.591225 1.463760 0.120337  
Zn -0.788677 -0.035641 -0.607306  
O 0.605573 -1.449000 0.226681  
H 3.657383 0.005853 -0.426054  
H 3.516741 0.052349 1.104774  
H 1.534654 1.202225 0.154413  
H 0.550305 2.373998 -0.203991  
H 0.540239 -2.397391 0.050508  
H 1.552994 -1.204694 0.229009

O -2.057051 0.036644 1.142490  
H -3.022686 0.074431 1.094060  
H -1.797779 0.367584 2.014868

#### IVb

-2084.972636  
O 2.073280 0.098556 -0.000130  
Zn 0.444157 -1.219599 0.000026  
O -0.822054 0.368224 -0.000037  
O -3.460918 0.309312 -0.000008  
O 0.961840 2.619948 0.000064  
H 1.941087 1.071119 0.000091  
H 3.016748 -0.107813 0.000128  
H -0.491830 1.284588 0.000036  
H -1.816093 0.352157 -0.000036  
H -4.028909 0.206184 -0.773917  
H -4.028913 0.205760 0.773843  
H 1.033001 3.203937 0.768897  
H 1.033015 3.203717 -0.768935

#### IVc

-2084.972207  
Zn -0.529470 -0.036578 -0.638299  
O -1.852284 -1.287516 0.594224  
H -2.252280 -2.091536 0.231273  
H -2.544223 -0.846025 1.109645  
O -1.245488 1.687936 0.510750  
H -0.627108 2.080981 1.145282  
H -1.704703 2.423951 0.079986  
O 1.023342 -0.283043 0.754093  
H 1.976959 -0.209769 0.478598  
H 0.960156 -1.022183 1.375154  
O 3.552995 -0.015136 0.004641  
H 4.014817 -0.521452 -0.675640  
H 4.231970 0.465432 0.495004

#### IVd

-2084.972089  
O -1.516755 0.787167 0.183174  
Zn 0.000000 -0.601184 0.000308  
O 1.516651 0.787226 -0.182343  
O 4.035269 0.078068 0.079314  
H -1.456889 1.554639 0.768887  
H -2.478934 0.530697 0.110586  
H 1.456341 1.555431 -0.767046  
H 2.478910 0.530851 -0.110497  
H 4.623836 0.395124 0.776128  
H 4.589542 -0.385432 -0.561221  
H -4.035133 0.078079 -0.080998

H -4.589885 -0.386214 0.558547  
H -4.623195 0.396085 -0.777806

#### IVe

-2084.971254  
O 0.189342 1.792585 0.354269  
Zn 0.787075 -0.044180 -0.642839  
O -0.917685 -1.121895 -0.024589  
O 1.791844 -0.589694 1.236693  
O -3.286375 0.061052 0.292720  
H 0.007840 2.604691 -0.140662  
H 0.668149 2.055205 1.154540  
H 1.370930 -1.259900 1.796173  
H 2.743973 -0.765142 1.264423  
H -1.092650 -1.969566 -0.456250  
H -1.800761 -0.676656 0.091823  
H -3.792529 0.005233 1.113631  
H -3.934228 0.195155 -0.411259

#### IVf

-2084.971231  
O -1.813662 -0.000124 0.870517  
O 0.363227 -1.423734 0.151006  
Zn 1.832765 0.000056 -0.202015  
O 0.363086 1.423627 0.151123  
H -2.642665 0.000001 0.323474  
H -2.107613 -0.000103 1.791556  
H -0.536956 -1.140733 0.444673  
H 0.442069 -2.385654 0.177121  
H 0.441827 2.385551 0.177418  
H -0.537058 1.140463 0.444790  
O -4.027828 0.000062 -0.622118  
H -4.560531 0.772069 -0.851456  
H -4.560605 -0.771932 -0.851326

#### IVg

-2084.969846  
O 0.459569 1.501257 -0.396128  
Zn 1.564567 -0.152575 0.045794  
O -0.030321 -1.510041 0.145119  
O -2.025603 1.618265 0.377738  
O -2.755882 -1.102488 -0.238007  
H -0.492675 1.640492 -0.111395  
H 0.870553 2.359618 -0.563031  
H -0.997828 -1.390720 -0.001856  
H 0.135161 -2.445759 0.322007  
H -3.341451 -1.531147 0.403330  
H -3.116016 -1.336109 -1.106070  
H -2.560761 0.846392 0.128650

H -2.616088 2.378540 0.444755

#### IVh

-2084.958051

O 0.359411 -0.000504 -0.540395  
Zn 2.177634 -0.000026 0.159633  
O -1.431476 -1.842932 -0.140213  
O -3.591707 0.000182 0.355552  
O -1.430314 1.843264 -0.140305  
H -0.245411 0.798424 -0.439274  
H -0.245823 -0.799109 -0.439048  
H -2.292085 1.406855 -0.003764  
H -1.595473 2.662533 -0.623179  
H -2.293740 -1.406982 -0.005358  
H -1.595407 -2.662935 -0.622271  
H -3.923100 -0.000450 1.265155  
H -4.385297 0.002357 -0.198374

#### Va

-2161.415199

O -0.000051 2.719671 0.000076  
O 1.460195 0.287477 0.000535  
Zn -0.000023 -1.138491 0.000095  
O -1.460146 0.287545 -0.000350  
O -4.098990 -0.040246 -0.000112  
H 0.000011 3.307870 0.768327  
H -0.000211 3.307861 -0.768183  
H 1.230764 1.235113 0.000152  
H 2.443091 0.163169 0.000292  
H -2.443056 0.163356 -0.000087  
H -1.230577 1.235154 0.000016  
H -4.640794 -0.243223 0.772723  
H -4.640727 -0.242685 -0.773135  
O 4.099040 -0.040262 -0.000385  
H 4.640609 -0.242895 -0.773471  
H 4.641189 -0.242462 0.772408

#### Vb

-2161.414755

Zn -0.119583 0.071521 -0.749126  
O 1.203175 1.459351 0.281611  
H 1.177951 2.406645 0.091456  
H 2.139741 1.199405 0.383845  
O -1.529054 -0.112748 0.773250  
H -2.510904 -0.085079 0.638458  
H -1.350549 -0.590646 1.593819  
O 1.180850 -1.469013 0.097152  
H 1.193240 -2.355655 -0.288301  
H 2.110352 -1.205581 0.254720

O 3.566854 -0.054356 0.614750  
H 4.317803 -0.033812 0.004554  
H 3.958708 -0.105382 1.498382  
O -4.170512 -0.010346 0.441514  
H -4.724758 -0.603884 -0.080154  
H -4.734581 0.725239 0.710773

#### Vc

-2161.414122

O 0.217293 2.964144 0.411008  
O -1.743971 1.110939 -0.320771  
Zn -0.632587 -0.719876 -0.570461  
O -1.266649 -1.625751 1.308488  
O 0.990512 0.179983 0.424888  
O 3.493667 -0.620358 -0.140017  
H 0.602831 3.616180 -0.191083  
H 0.118233 3.426870 1.255192  
H -1.241305 1.934506 -0.155171  
H -2.512530 1.328355 -0.864383  
H 1.911938 -0.111423 0.214313  
H 0.985210 1.154156 0.462429  
H -1.743496 -2.466713 1.347853  
H -0.672267 -1.600305 2.072421  
H 3.830596 -0.898085 -1.001076  
H 4.171589 -0.858903 0.504569

#### Vd

-2161.414081

O -1.983155 0.020473 0.889768  
O -0.268963 -1.937048 0.248483  
Zn 1.503451 -0.960539 -0.232340  
O 0.576818 0.804555 0.130851  
O -4.132640 0.533070 -0.646550  
O 1.594681 3.259415 0.040364  
H -2.267014 0.137727 1.805930  
H -2.780246 0.214020 0.335743  
H -0.360354 0.812983 0.415383  
H 0.953032 1.720304 0.097364  
H -0.466083 -2.880950 0.280346  
H -1.056157 -1.403845 0.522762  
H -4.439774 1.405059 -0.924447  
H -4.854377 -0.078673 -0.838683  
H 1.748993 3.774079 -0.761736  
H 2.124506 3.671750 0.734200

#### Ve

-2161.413584

O -0.842842 0.201959 1.472016  
Zn -0.072495 -1.200496 -0.001143



O -0.838457 0.207127 -1.471803  
O 1.909457 -0.546724 0.000844  
O 2.899800 1.943321 0.001872  
O -2.829553 1.571647 0.000398  
H -0.969896 -0.083485 2.386890  
H -1.633758 0.713790 1.209199  
H 2.645233 -1.171232 0.002121  
H 2.279222 0.373657 0.001142  
H -0.962862 -0.075837 -2.387818  
H -1.630317 0.717853 -1.209839  
H -3.761653 1.311022 -0.001220  
H -2.836272 2.539478 0.002240  
H 3.328534 2.334780 0.773786  
H 3.329381 2.336229 -0.768831

#### Vf

-2161.413184  
O -2.639192 1.741466 0.178735  
O -1.700379 -0.829505 0.854083  
Zn -0.000289 -1.054079 -0.470847  
O 1.699656 -0.830114 0.853561  
O 0.000204 1.077107 -0.712650  
O 2.640424 1.740448 0.179073  
H -3.294127 1.891075 -0.518141  
H -2.873367 2.362754 0.882657  
H -2.250493 -0.033315 0.706649  
H -2.295407 -1.574443 1.015334  
H 0.794796 1.569759 -0.435694  
H -0.793946 1.569901 -0.434574  
H 3.295656 1.889719 -0.517588  
H 2.875439 2.360656 0.883658  
H 2.249707 -0.033736 0.706719  
H 2.294712 -1.575210 1.013959

#### Vg

-2161.411852  
O 0.953114 0.519007 -0.137764  
Zn 0.485473 -1.405543 0.084888  
O -1.619366 -1.241769 -0.003764  
O -0.851087 2.370841 0.465377  
O 3.491033 1.350171 -0.213792  
O -3.268700 0.988729 -0.321577  
H 0.340888 1.269582 0.081847  
H 1.890025 0.835813 -0.153099  
H -2.213436 -0.466039 -0.123513  
H -2.168616 -2.034301 0.056182  
H 3.995954 1.536914 -1.014980  
H 4.112574 1.414843 0.521858  
H -4.004338 1.068784 0.302683  
H -3.661609 1.119358 -1.196579

H -1.754704 2.197786 0.154763  
H -0.740867 3.327728 0.516366

#### Vh

-2161.408359  
O 1.237684 1.710687 0.704829  
O -0.175092 -0.718872 0.954987  
Zn -1.869639 -0.371936 -0.138365  
O -1.219120 1.604560 -0.506876  
O 1.824296 -2.046503 -0.161383  
O 3.456747 0.409405 -0.522560  
H 1.495317 2.380337 1.352122  
H 2.062835 1.414669 0.266763  
H -0.334601 1.898572 -0.194985  
H -1.681490 2.336008 -0.935348  
H 0.507295 -1.351203 0.599149  
H 0.324330 0.099696 1.151134  
H 2.186333 -2.926789 -0.001885  
H 2.573893 -1.446047 -0.306847  
H 3.644125 0.605790 -1.451814  
H 4.315020 0.472825 -0.079321

#### Vi

-2161.408283  
O 0.180794 -0.717323 0.972185  
Zn 1.855726 -0.378285 -0.155331  
O 1.228403 1.613859 -0.472101  
O -1.823708 -2.046387 -0.132621  
O -3.433258 0.410863 -0.553953  
O -1.235147 1.716704 0.711790  
H -0.314497 0.101994 1.174102  
H -0.507112 -1.348135 0.624163  
H -2.053357 1.418572 0.262526  
H -1.502482 2.389469 1.351889  
H -2.193326 -2.920848 0.040940  
H -2.567803 -1.443011 -0.293802  
H -3.592697 0.595494 -1.490822  
H -4.303479 0.485892 -0.136558  
H 0.339751 1.903804 -0.167015  
H 1.686548 2.343591 -0.907888

#### Vla

-2237.855714  
O 1.374876 -1.045684 0.742643  
Zn -0.000106 0.000047 -0.505518  
O 0.218025 1.713463 0.742941  
O -1.593063 -0.667891 0.742848  
O 3.017846 -2.938578 -0.219546  
O -4.053797 -1.143894 -0.219651

H -2.495158 -0.853428 0.380616  
H -1.363683 -1.406352 1.323849  
H -0.536309 1.884069 1.323781  
H 0.508469 2.587429 0.380689  
H 1.899663 -0.477840 1.323723  
H 1.986652 -1.734035 0.380274  
H 3.214851 -3.785234 0.199872  
H 3.534356 -2.911328 -1.034392  
H -4.288261 -1.604580 -1.034694  
H -4.885628 -0.891451 0.199728  
O 1.036411 4.082453 -0.219609  
H 1.670940 4.676577 0.199842  
H 0.754915 4.515811 -1.034755

### Vlb

-2237.854881  
O 0.001118 1.971868 0.864786  
O 1.443031 -0.261520 0.143164  
Zn -0.000733 -1.634937 -0.260139  
O -1.443271 -0.260936 0.145733  
O -4.107174 -0.531495 0.114052  
H 0.001438 2.261468 1.786196  
H 0.001437 2.799875 0.327413  
H 1.176060 0.639757 0.423416  
H 2.425492 -0.362168 0.133057  
H -2.425843 -0.360385 0.134554  
H -1.175558 0.640543 0.424573  
H -4.649773 -0.564382 -0.683722  
H -4.626809 -0.951435 0.810937  
O 4.106746 -0.534375 0.114732  
H 4.625481 -0.955246 0.811724  
H 4.650114 -0.566783 -0.682538  
O 0.001611 4.233075 -0.628580  
H -0.769458 4.767273 -0.855972  
H 0.772946 4.766634 -0.856566

### Vlc

-2237.854522  
O 2.909103 -1.719825 0.812072  
O 1.238939 0.622038 0.465298  
Zn -0.322516 -0.124181 -0.768213  
O -1.694293 0.047954 0.812243  
O 0.372648 -2.136164 -0.315231  
O -4.331902 0.446264 0.525344  
O 2.343342 3.040579 -0.022708  
H 0.181742 -2.868906 -0.915251  
H 1.296806 -2.231883 -0.008853  
H 1.633601 1.506970 0.277250  
H 1.971581 0.006525 0.648237  
H 3.748856 -1.840415 0.347238

H 3.062270 -2.058725 1.705270  
H -1.418243 0.519259 1.609380  
H -2.663223 0.204390 0.688440  
H 2.465493 3.453591 -0.886643  
H 2.470912 3.740113 0.630142  
H -4.769646 1.075763 -0.060911  
H -5.007348 -0.188014 0.795941

### Vld

-2237.854099  
O -0.007181 2.803014 0.809025  
O 1.480691 0.401671 0.344518  
Zn -0.015479 -0.889791 -0.419531  
O 0.142852 -2.045054 1.444623  
O -1.500715 0.433807 0.217213  
O 3.913950 0.505642 -0.831420  
O -4.041170 0.400424 -0.685772  
H 2.367523 0.433827 -0.087342  
H 1.192992 1.320430 0.503403  
H -2.424188 0.413287 -0.130217  
H -1.248272 1.359260 0.385210  
H 0.034839 3.573740 0.226226  
H -0.056596 3.165439 1.704484  
H 0.885626 -1.821625 2.024330  
H 0.064130 -3.009243 1.449369  
H -4.328199 0.290863 -1.600888  
H -4.798169 0.161344 -0.136440  
H 4.103333 0.336295 -1.762762  
H 4.763924 0.474063 -0.374931

### Vle

-2237.853713  
O -2.510975 2.426791 0.089126  
O -2.562714 -0.353660 0.540174  
Zn -0.799043 -1.028752 -0.538732  
O -0.078709 0.984312 -0.524685  
O 0.563741 -1.452725 1.068689  
O 2.272940 0.680270 0.928535  
O 4.538760 0.549647 -0.534689  
H 0.754538 1.123853 -0.026023  
H -0.710594 1.686883 -0.289610  
H -3.381202 -0.866240 0.496995  
H -2.794207 0.589820 0.420805  
H -2.951446 2.843000 -0.665350  
H -2.656043 3.030522 0.831024  
H 5.310690 -0.005395 -0.368158  
H 4.791040 1.154836 -1.243075  
H 1.324750 -0.829121 1.124477  
H 0.898681 -2.349327 1.201060  
H 2.489368 1.163774 1.736093

H 3.111354 0.642884 0.406511

#### Vlf

-2237.853075

O 0.755762 2.956128 0.224816  
O 1.493763 0.176491 0.462878  
Zn -0.022870 -0.764578 -0.636160  
O -1.369250 -1.478773 0.941479  
O -1.168258 1.061110 -0.655869  
H 1.124297 3.533882 -0.458163  
H 0.716253 3.501417 1.022637  
H -0.720496 1.861495 -0.321423  
H -2.068120 1.025769 -0.284262  
H 2.425099 -0.148970 0.419353  
H 1.507389 1.150231 0.440790  
H -2.280148 -1.128675 0.875699  
H -1.436052 -2.428445 1.110110  
O -3.651818 0.131054 0.465277  
H -4.137131 0.514201 1.209261  
H -4.329896 -0.106314 -0.183111  
O 4.046610 -0.692175 0.374874  
H 4.498252 -1.053297 -0.398174  
H 4.532188 -1.014639 1.144446

#### Vlg

-2237.852788

O 1.591899 0.103951 -0.153812  
Zn 0.164046 -1.293491 0.031453  
O -1.511398 -0.111429 -0.041807  
O 4.209742 -0.507436 -0.119492  
O -3.989320 -1.134008 0.106054  
H 1.465177 1.059535 0.082529  
H 2.552080 -0.122735 -0.128444  
H -1.585098 0.857233 -0.156521  
H -2.419422 -0.498613 0.011461  
H -4.423512 -1.608965 -0.613992  
H -4.387941 -1.463846 0.921470  
H 4.757691 -0.642235 -0.902552  
H 4.725968 -0.826874 0.630858  
O -1.713104 2.719109 -0.343372  
H -2.331292 3.143629 0.268181  
H -1.966197 3.036702 -1.221550  
O 1.026668 2.624063 0.489105  
H 0.159710 2.929236 0.172167  
H 1.615556 3.387663 0.499395

#### Vlh

-2237.852307

O -0.585255 -2.344610 0.520944

Zn -0.824642 -0.471861 -0.640463

O 5.509171 0.528922 0.513636  
O -4.239127 1.805747 0.180154  
O -2.199423 0.201015 0.833069  
O 0.789190 0.251316 0.482220  
O 3.051706 0.862887 -0.633485  
H 1.661192 0.509880 0.053418  
H 0.574373 0.934560 1.131629  
H -4.878863 1.682843 -0.532103  
H -0.729570 -3.216050 0.125251  
H -4.520012 2.590282 0.667237  
H 0.266527 -2.386469 0.981297  
H -2.541305 -0.474969 1.434494  
H 5.970234 1.194293 1.039307  
H -2.963121 0.783254 0.588547  
H 6.190412 -0.076991 0.196661  
H 3.943090 0.744877 -0.237408  
H 3.156193 1.428117 -1.406762

#### Vli

-2237.849806

O -0.806178 -1.070998 0.830609  
Zn 1.019231 -1.403233 -0.044689  
O 1.469826 0.605604 0.001635  
O -3.017583 -1.110221 -0.658531  
O -0.926509 1.703702 1.052825  
O -3.324286 1.840665 -0.516338  
H -0.904281 -0.143088 1.132299  
H -1.633768 -1.257552 0.315385  
H -1.725704 1.921023 0.531813  
H -0.949860 2.269777 1.835196  
H -3.756741 -1.727591 -0.717711  
H -3.388267 -0.212844 -0.687377  
H -3.277953 2.266138 -1.384400  
H -4.113014 2.215470 -0.099147  
H 0.794985 1.248971 0.288416  
H 2.326081 1.060866 -0.194422  
O 3.778757 1.847775 -0.508441  
H 4.126211 2.047101 -1.386809  
H 4.533166 1.876521 0.093371

#### Vlla

-2314.292479

O -0.206430 0.007302 -1.594955  
Zn -1.925405 -0.089646 -0.352493  
O -1.183297 1.593237 0.776811  
O -1.008759 -1.665159 0.810193  
O 2.045791 1.559536 -1.059666  
O 1.421906 1.349484 1.670433  
O 1.689086 -1.393554 1.392667

O 2.574288 -1.184533 -1.151858  
H -1.512364 -2.341484 1.279938  
H -0.074311 -1.691830 1.116760  
H 0.286375 -0.800186 -1.805161  
H 0.472381 0.709940 -1.497882  
H -0.318668 1.579959 1.246388  
H -1.797607 2.137304 1.286193  
H 1.801780 1.790252 2.441375  
H 1.606683 0.388399 1.771889  
H 2.167527 -1.987659 1.985339  
H 2.129935 -1.457793 0.508339  
H 2.344517 2.364769 -1.501036  
H 1.983980 1.759189 -0.104049  
H 3.273522 -1.660794 -1.616921  
H 2.737746 -0.231181 -1.285381

#### VIIb

-2314.292152  
O 1.855486 -0.545347 -0.153835  
Zn 1.124889 1.291202 0.163769  
O -0.856575 1.017126 -0.239008  
O 4.421876 -1.190815 0.365590  
O -2.202801 -1.319258 -0.821373  
O 0.257077 -2.622506 -0.522756  
O -2.573823 3.102175 -0.119055  
H 1.312686 -1.365346 -0.308857  
H 2.788997 -0.788115 0.047050  
H -1.357517 0.190971 -0.433789  
H -1.485056 1.775365 -0.190678  
H -2.790495 3.570120 0.697328  
H -2.656625 3.753582 -0.827125  
H 4.805454 -1.416663 1.221802  
H 5.161897 -1.093412 -0.246117  
H -2.880247 -1.616054 -0.167772  
H -2.648482 -1.322380 -1.678249  
H -0.655471 -2.338602 -0.728415  
H 0.450962 -3.389926 -1.073333  
O -4.018334 -2.176629 1.001886  
H -4.011767 -3.053077 1.406143  
H -4.844260 -1.760497 1.277353

#### VIIc

-2314.291968  
O -0.060513 1.728221 0.000223  
O -0.166116 3.293594 -2.268056  
O -1.411884 -0.606633 0.030971  
Zn 0.069668 -1.988577 0.000554  
O 1.450699 -0.506333 -0.029226  
O -4.086438 -0.939878 0.016624  
O 4.141839 -0.654864 -0.018825

H -0.064072 2.314942 0.786653  
H -0.097878 2.313613 -0.786318  
H 1.124045 0.424989 -0.019505  
H 2.434507 -0.555314 -0.024850  
H -2.389863 -0.724196 0.025115  
H -1.151158 0.345235 0.020517  
H -4.595337 -1.213800 -0.756633  
H -4.600630 -1.215116 0.785910  
H 4.669242 -0.892586 0.754011  
H 4.672752 -0.894884 -0.788548  
H -0.952159 3.717420 -2.633784  
H 0.584881 3.699618 -2.717924  
O -0.064214 3.299414 2.266962  
H 0.690274 3.777683 2.632002  
H -0.841639 3.651547 2.717345

#### VIIId

-2314.289124  
O -0.851228 1.041880 -0.269469  
Zn 1.075556 1.376845 0.131749  
O 1.817171 -0.524600 -0.061359  
O -1.826222 -1.309468 0.265682  
O -4.444248 -2.184239 0.410105  
O -2.647304 3.073318 -0.291571  
O 4.423564 -1.112169 0.286134  
O 0.429645 -2.902242 -0.708253  
H -1.303244 0.167189 -0.070556  
H -1.508905 1.774158 -0.260174  
H 1.341283 -1.348872 -0.292258  
H 2.774435 -0.729008 0.065520  
H 5.112994 -0.902066 -0.356494  
H 4.858572 -1.125009 1.148135  
H -2.896950 3.562534 -1.085250  
H -2.895304 3.630837 0.456216  
H 0.664798 -3.679225 -0.182456  
H 0.470888 -3.195863 -1.628791  
H -1.306385 -2.035743 -0.108947  
H -2.761901 -1.596332 0.292747  
H -5.161446 -2.059816 -0.223264  
H -4.866544 -2.427966 1.242971

#### VIIe

-2314.288273  
O -1.180993 1.235224 -0.023853  
O 1.462984 0.580503 0.321867  
Zn 1.534627 -1.303242 -0.480835  
O -0.428541 -1.186092 -1.057253  
O 3.456025 2.084981 1.318127  
O -2.263556 -2.499710 0.377245  
O -3.203045 -0.049871 1.687310

H -1.508470 2.026506 -0.507072  
H -1.869623 0.996359 0.621782  
H 0.601536 1.049780 0.346159  
H 2.190084 1.135793 0.691108  
H -1.078966 -1.811548 -0.647439  
H -0.790861 -0.289309 -0.864263  
H -2.847847 -3.243885 0.189691  
H -2.788195 -1.832628 0.852109  
H -3.065735 -0.061542 2.644889  
H -4.114393 0.253444 1.571985  
H 4.123553 2.525216 0.777164  
H 3.858099 1.955375 2.186188  
O -2.136745 3.415332 -1.372356  
H -1.974809 4.340869 -1.151401  
H -2.422212 3.409893 -2.294521

### VIIIf

-2314.287673  
O 0.463498 1.660283 1.201975  
O -1.869379 0.619967 -0.010839  
Zn -1.435214 -1.392714 -0.122180  
O 0.320496 -1.125359 0.850691  
O 2.566263 -2.102402 -0.010206  
O 3.972604 0.075540 -0.898826  
O 2.777223 2.707083 -0.123288  
H 0.406758 2.049098 2.084512  
H 1.227694 2.090711 0.767105  
H -1.210625 1.242923 0.349578  
H -2.712622 1.085812 -0.230373  
H 1.179765 -1.562763 0.563336  
H 0.521090 -0.197519 1.088005  
H 3.121873 -2.721123 0.478024  
H 3.151854 -1.390026 -0.348603  
H 2.605276 3.350551 -0.825255  
H 3.437557 3.128987 0.444935  
H 3.628316 0.975402 -0.781590  
H 4.561706 0.099476 -1.662040  
O -4.160713 1.879291 -0.600539  
H -4.944719 1.866770 -0.037118  
H -4.477440 2.047898 -1.496853

### VIIIa

-2390.731489  
O 1.470763 0.886023 -1.092227  
Zn 2.087858 -0.896830 -0.119261  
O 1.518192 -0.047880 1.786958  
O 0.234417 -1.834151 -0.645255  
O -2.028275 -0.478670 -0.042626  
O -0.913183 1.239688 1.907070  
O -0.342035 3.107985 0.030806

O -1.139412 1.307182 -1.930122  
H 1.916178 -0.331193 2.619298  
H 0.656491 0.390327 1.979725  
H 1.565415 1.730416 -0.626536  
H 0.605569 0.940471 -1.556026  
H -0.651690 -1.473525 -0.387642  
H 0.176744 -2.796876 -0.682347  
H -2.919448 -0.881583 0.059009  
H -1.851551 0.045851 0.763901  
H -1.320511 1.539766 2.729441  
H -0.761961 2.046150 1.354776  
H -1.485290 1.312902 -2.831013  
H -1.650998 0.638399 -1.420724  
H -0.430338 4.068927 0.043784  
H -0.787941 2.788236 -0.777804  
O -4.505804 -1.603928 0.216610  
H -4.721755 -2.458456 0.609750  
H -5.331948 -1.264911 -0.149465

### VIIIb

-2390.731173  
O -4.663878 0.683658 -0.585208  
Zn -0.990004 -1.181526 0.397500  
O 0.404356 -0.334594 1.849919  
O -2.032850 0.601876 0.049192  
O 0.367374 -0.742852 -1.191477  
O 3.086039 -1.701046 -1.036464  
O 1.661270 1.996928 1.017074  
H 1.281461 -1.084091 -1.176663  
H 0.398315 0.207775 -1.429103  
H -1.565663 1.270459 -0.487814  
H -2.989773 0.612887 -0.187204  
H -5.126515 0.059546 -1.158156  
H -5.334086 1.051880 0.003960  
H 0.812598 0.547393 1.687555  
H 0.176682 -0.383787 2.787287  
H 3.447598 -2.010215 -1.879086  
H 3.174181 -2.452443 -0.433118  
H 2.544158 1.672597 0.704403  
H 1.832876 2.738389 1.611109  
O 3.856646 0.896570 -0.053199  
H 4.797302 1.068171 0.069864  
H 3.770364 -0.021908 -0.365109  
O 0.039182 2.001994 -1.214810  
H 0.630862 2.252105 -0.472018  
H 0.104633 2.696732 -1.881137

### VIIIc

-2390.730894  
O 0.843819 -1.123138 -1.557554  
Zn 2.141010 -0.235868 -0.085541

O 0.829580 -0.669046 1.522556  
O 1.419592 1.784396 -0.141900  
O -1.820036 -1.735188 -1.180621  
O -1.356696 0.882193 2.166683  
O -1.263311 2.396276 -0.125331  
H 1.979713 2.458536 -0.547116  
H 0.479019 2.066316 -0.243643  
H 1.212396 -1.537409 -2.347665  
H -0.094809 -1.412134 -1.463971  
H 0.153348 -0.030233 1.844327  
H 0.440614 -1.547451 1.639821  
H -1.467753 1.356616 3.000276  
H -1.441625 1.546625 1.444508  
H -1.523173 3.324908 -0.178277  
H -1.788665 1.916886 -0.823197  
H -2.191251 -2.518078 -1.607385  
H -2.000621 -1.832879 -0.212345  
O -2.515567 0.894755 -1.913708  
H -3.348068 1.036540 -2.378467  
H -2.421767 -0.066928 -1.766410  
O -2.065709 -1.752907 1.518198  
H -2.700677 -2.264848 2.034276  
H -2.090353 -0.839148 1.864917

#### VIIId

-2390.729156  
O 4.139035 1.099593 -0.743601  
O 1.625696 0.681949 0.224335  
Zn 0.105362 -0.012676 -1.097694  
O -1.483347 0.863048 0.028341  
O 0.079444 -1.855159 -0.077057  
O -2.917637 2.923680 -1.050109  
O 0.899853 -0.904309 2.442005  
O -1.035278 1.119743 2.930312  
H -0.538220 -2.595507 -0.271075  
H 0.244463 -1.817069 0.882949  
H 1.715410 0.135654 1.027735  
H 2.527703 0.838504 -0.137997  
H 4.518024 0.611473 -1.485247  
H 4.596321 1.949413 -0.724216  
H -1.346757 1.078871 0.968002  
H -1.988957 1.604067 -0.376843  
H -2.533771 3.560695 -1.665994  
H -3.834250 2.808562 -1.331156  
H -1.846359 0.965643 3.434350  
H -0.693302 1.965072 3.253195  
H 0.250939 -0.290300 2.835592  
H 1.351815 -1.341535 3.173948  
O -1.550153 -3.975723 -0.599761  
H -2.465749 -3.936513 -0.902622  
H -1.179074 -4.779322 -0.985506

#### VIIIe

-2390.727090  
O 1.737380 -0.489311 -0.119803  
Zn 0.455378 -2.011221 -0.190800  
O -1.336050 -1.072068 0.079552  
O 1.009409 1.893970 0.583437  
O 4.415779 -0.924481 0.081892  
O -3.656143 -2.477562 -0.012348  
O -1.802494 1.499002 0.895584  
H 1.501649 0.458207 0.131201  
H 2.705416 -0.635096 -0.032426  
H -1.523620 -0.147292 0.370108  
H -2.178252 -1.581922 0.053880  
H -4.013872 -2.823326 -0.839957  
H -3.921331 -3.105478 0.671690  
H 4.996624 -1.151546 -0.654520  
H 4.904196 -1.138575 0.886163  
H -2.057243 1.602920 1.821277  
H -2.453036 2.029328 0.380589  
H 0.043179 1.979490 0.657912  
H 1.355141 2.729875 0.212043  
O 1.967946 4.325463 -0.382787  
H 2.341391 4.484972 -1.258377  
H 2.447241 4.912849 0.215004  
O -3.570103 2.996122 -0.545167  
H -4.489160 2.789157 -0.754021  
H -3.445469 3.923994 -0.779451

#### VIII f

-2390.725452  
O 0.457442 1.570655 0.218572  
O -1.875235 0.285661 -0.437348  
Zn -1.537102 -1.608766 0.279524  
O 0.247438 -1.047541 1.051447  
O 2.429954 -2.398991 0.585462  
O 3.892174 -0.826974 -1.115912  
O 2.741870 1.855351 -1.580812  
H 0.491992 2.295929 0.880466  
H 1.186292 1.737083 -0.406730  
H -1.170946 0.960255 -0.325923  
H -2.696345 0.676466 -0.817068  
H 1.077406 -1.599957 0.938931  
H 0.476977 -0.111255 0.855375  
H 2.984868 -2.797999 1.265530  
H 3.025985 -1.905055 -0.020022  
H 2.538478 2.112823 -2.490730  
H 3.389412 2.506638 -1.276182  
H 3.550545 0.040382 -1.390302  
H 4.450036 -1.146047 -1.834808  
O -4.130523 1.338939 -1.479329

H -4.925788 1.518746 -0.962242  
H -4.433187 1.162519 -2.379006  
O 0.629274 3.591779 2.072101  
H 0.913359 3.452879 2.984325  
H 0.114838 4.408532 2.079212

### VIIIg

-2390.725422  
O 1.125152 -0.281376 0.139147  
O -0.903395 1.485179 0.325414  
Zn -2.523177 0.288007 0.071586  
O -1.340693 -1.361404 0.151529  
O -1.996322 -3.928823 -0.347117  
O -0.732905 4.129117 -0.169355  
O 3.367644 -0.581929 2.017683  
O 2.721766 -0.072382 -1.975150  
H 1.664652 -0.252754 -0.698749  
H 1.776446 -0.405104 0.852459  
H -0.023370 1.040475 0.261551  
H -0.833633 2.448031 0.126838  
H -1.573650 -2.298036 -0.046411  
H -0.364952 -1.212868 0.128242  
H -2.354809 -4.521803 0.325021  
H -2.279161 -4.286812 -1.197769  
H -0.717418 4.552447 -1.036576  
H -0.986656 4.814769 0.460784  
H 3.525507 -1.462664 2.384752  
H 3.413733 0.017035 2.775314  
H 3.621681 -0.078636 -1.580129  
H 2.756937 -0.651856 -2.744832  
O 4.960050 -0.188147 -0.421525  
H 4.653216 -0.217886 0.499378  
H 5.806404 0.273560 -0.422466

### VIIIh

-2390.720275  
O -1.952599 2.963910 -0.544239  
Zn -0.687308 -0.517037 -0.306792  
O -0.107413 -0.987037 1.665925  
O 2.579251 -1.124348 -2.065858  
O -2.475046 0.494307 0.193682  
O 0.461767 1.627203 0.124223  
O 3.093071 0.885786 -0.343462  
H 1.398408 1.514287 -0.156392  
H 0.523783 1.812933 1.073373  
H -2.693648 0.538750 1.135338  
H -2.447951 1.436549 -0.129059  
H -0.985657 2.909828 -0.618733  
H -2.267866 3.600189 -1.196724  
H 2.983036 -1.439675 -2.884416

H 1.618858 -1.185495 -2.190096  
H 0.812613 -0.716186 1.932921  
H -0.255512 -1.893611 1.964952  
H 3.832943 1.462753 -0.569836  
H 3.057854 0.181097 -1.034599  
O -2.092454 -2.353976 -0.139141  
H -3.015093 -2.098873 -0.287870  
H -1.941320 -3.131707 -0.694418  
H 2.808146 0.254632 1.383735  
O 2.279997 0.046475 2.181519  
H 2.898056 -0.152905 2.894392

### Xa

-2543.606781  
O 0.967294 -1.811602 -2.038188  
O -0.620650 0.423826 -1.568392  
Zn -2.287456 0.389730 -0.289947  
O -1.686721 -1.372922 0.767622  
O -1.411192 1.613742 1.284438  
O 1.355270 2.372817 -1.568753  
O 1.197214 2.562023 1.223304  
O 2.627129 0.240017 1.527802  
O 2.940740 0.000388 -1.059104  
O 0.747070 -1.700889 2.125908  
O 0.304450 -3.489105 0.018012  
H -0.889070 -1.334410 1.338713  
H -1.632453 -2.232781 0.322915  
H -2.007085 2.193359 1.775997  
H -0.518012 2.029174 1.287734  
H 1.462660 3.301025 1.785618  
H 1.775473 1.799137 1.470747  
H -0.007975 1.183414 -1.668697  
H -0.121327 -0.391835 -1.793402  
H 3.483941 0.205584 1.972757  
H 2.815491 0.098406 0.548168  
H 1.352488 2.710830 -0.650266  
H 1.439902 3.135563 -2.154463  
H 2.413358 -0.708330 -1.474957  
H 2.614401 0.827520 -1.454830  
H 0.771460 -2.528346 -1.389899  
H 1.006237 -2.228827 -2.908028  
H 0.648494 -3.091054 0.842555  
H 0.471845 -4.438050 0.072785  
H 1.456327 -1.026658 2.003887  
H 0.722697 -1.901996 3.069890

### Xb

-2543.606095  
O 1.342842 1.108468 -1.286382  
Zn -0.091291 2.453334 -0.449003

O 0.127002 1.661903 1.504179  
O -1.889622 1.333297 -0.717569  
O -2.097706 -1.287720 -0.135712  
O -0.010337 -2.590222 -1.209350  
O -1.234742 -0.593768 2.330174  
O 2.193278 -1.214247 -0.212442  
O 1.553146 -0.774132 2.442639  
O -4.554814 -2.447988 -0.645578  
H -2.525992 1.633564 -1.377646  
H -1.998905 0.351279 -0.603398  
H 1.807677 1.321051 -2.104199  
H 1.707090 0.256782 -0.925943  
H -0.515438 0.992880 1.832213  
H 0.988307 1.346136 1.819078  
H -1.896611 -0.634579 3.030932  
H -1.657374 -0.954250 1.509803  
H -2.957071 -1.723766 -0.316687  
H -1.394926 -1.845293 -0.556957  
H 3.118972 -1.486353 -0.388571  
H 2.092414 -1.154060 0.762686  
H 0.104220 -3.540059 -1.323667  
H 0.847740 -2.233205 -0.896112  
H 2.018978 -1.099441 3.222346  
H 0.601544 -0.948741 2.588932  
H -4.985111 -2.499627 -1.507863  
H -5.080022 -3.003512 -0.056772  
O 4.793905 -1.963360 -0.754149  
H 5.580797 -1.406008 -0.717215  
H 5.098801 -2.830663 -1.047331

### Xc

-2543.605844  
O 4.714781 -1.667979 -0.521430  
Zn 0.892793 0.046492 -1.125894  
O 0.929625 4.159279 -0.122080  
O -0.013447 1.582036 0.004398  
O -3.960703 -0.188348 -2.645022  
O 2.451757 -0.343986 0.260264  
O -0.296754 -1.494511 -0.253298  
O -3.099513 -1.465121 -0.396522  
O -0.794565 0.822495 2.605539  
H -1.275236 -1.495735 -0.323049  
H -0.056802 -1.683670 0.676638  
H 2.137814 -0.775067 1.079327  
H 3.262457 -0.814174 -0.037825  
H 4.765349 -2.247976 -1.291394  
H 5.602990 -1.309586 -0.401519  
H -4.847631 0.129307 -2.853759  
H -3.464100 -0.160038 -3.472125  
H -0.258908 1.420093 0.939846  
H 0.336882 2.497288 -0.060022

H -3.467385 -2.357083 -0.441396  
H -3.430986 -1.004040 -1.201812  
H 1.866895 4.384275 -0.174845  
H 0.464875 4.857099 -0.600582  
H -1.733679 0.517386 2.505469  
H -0.787407 1.467060 3.323529  
O -3.201527 -0.229518 2.118839  
H -4.079602 0.015375 2.430859  
H -3.309706 -0.620617 1.228145  
O 0.805112 -1.375021 2.297054  
H 0.282032 -0.616697 2.642117  
H 0.930230 -1.992573 3.027273

### Xd

-2543.605543  
O 0.274360 -1.802426 1.706153  
Zn -0.260140 -2.477027 -0.278599  
O -2.001388 -1.284343 -0.589656  
O 0.923327 -1.056975 -1.285355  
O -2.053246 1.368415 -0.135188  
O -1.002894 1.901586 2.292669  
O 0.096214 1.530273 -1.803445  
O 1.503815 0.601096 2.215597  
O 2.456415 1.078746 -0.242493  
H -2.866004 -1.700379 -0.487831  
H -2.093374 -0.320424 -0.359510  
H 0.408110 -2.459167 2.400556  
H 0.758084 -0.980607 1.962570  
H 0.481227 -0.276879 -1.685929  
H 1.713883 -0.667401 -0.866344  
H -0.050290 1.975414 -2.646548  
H -0.736028 1.627152 -1.280293  
H -2.908337 1.822478 -0.289705  
H -1.746620 1.632816 0.766929  
H 2.162051 0.685317 2.916543  
H 1.956341 0.855394 1.368669  
H -1.058410 2.708385 2.816736  
H -0.096066 1.553848 2.399540  
H 3.350598 1.418050 -0.463010  
H 1.814111 1.560306 -0.795353  
O 5.001529 1.934806 -0.816820  
H 5.623880 1.457513 -1.379255  
H 5.422026 2.778928 -0.612666  
O -4.491281 2.588483 -0.605526  
H -5.311532 2.409793 -0.129435  
H -4.674270 3.352996 -1.165160

### Xe

-2543.605483  
O -1.572349 -1.085052 -1.052920



Zn -1.126093 -2.288034 0.622373  
O -1.069543 -0.564383 1.893486  
O 0.939773 -2.361919 0.031346  
O 0.532189 1.420939 1.077779  
O 2.107100 -0.041236 -0.679798  
O 4.848736 0.079734 -1.008504  
O 0.415000 0.490877 -2.771998  
O -1.339765 1.618282 -0.991494  
H 1.533804 -3.046540 0.361288  
H 1.476031 -1.558121 -0.201864  
H -1.043069 -1.221971 -1.853106  
H -1.638673 -0.101744 -0.957741  
H -0.440687 0.187581 1.725572  
H -1.151357 -0.687255 2.846988  
H 0.927282 2.109100 1.652561  
H 1.257586 1.019515 0.551018  
H 3.075778 0.022930 -0.815342  
H 1.678088 0.177122 -1.538202  
H -2.082901 2.258240 -1.007397  
H -0.787159 1.814390 -0.208254  
H 0.572657 0.787515 -3.675789  
H -0.219730 1.119349 -2.366968  
H 5.428431 0.826130 -0.814069  
H 5.392181 -0.557378 -1.488121  
O -3.450485 3.388120 -1.024123  
H -4.343938 3.133518 -0.761984  
H -3.557476 4.127483 -1.635095  
O 1.623858 3.382970 2.693748  
H 1.953832 3.274538 3.594086  
H 1.475999 4.329955 2.581057

#### Xf

-2543.604362  
O 0.000057 0.141438 -1.361251  
Zn 0.000021 -1.582300 -0.148131  
O -0.000074 -0.569069 1.700910  
O 2.526942 -1.276741 -0.098266  
O -2.527059 -1.276693 -0.098462  
O -2.532110 0.517189 1.948421  
O 2.628488 0.737765 -1.988434  
O -2.628314 0.737888 -1.988502  
O 2.531945 0.517262 1.948484  
H 0.806394 0.477256 -1.801038  
H -0.806266 0.477288 -1.801044  
H 2.954865 -2.140213 -0.025587  
H 2.722594 -0.785231 0.733933  
H 0.799291 -0.044076 1.918215  
H -0.799495 -0.044142 1.918182  
H 3.022836 0.572956 2.777041  
H 2.719442 1.348250 1.439636

H -2.954987 -2.140171 -0.025889  
H -2.722758 -0.785264 0.733768  
H -3.102421 0.698497 -2.828345  
H -2.845146 -0.082243 -1.496935  
H 2.845256 -0.082362 -1.496839  
H 3.102633 0.698329 -2.828253  
H -3.023027 0.572869 2.776964  
H -2.719575 1.348195 1.439592  
O 2.864152 2.518335 0.216151  
H 2.898037 2.120113 -0.673867  
H 3.418652 3.306474 0.198357  
O -2.864087 2.518351 0.216148  
H -2.897907 2.120173 -0.673893  
H -3.418568 3.306502 0.198343

#### Xg

-2543.601715  
Zn -1.349991 -1.426320 -0.107014  
O 2.559941 0.040521 -1.641701  
H 2.925002 -0.571370 -0.964525  
H 2.999004 -0.170890 -2.475387  
O -3.097507 0.078874 -0.445462  
H -3.972173 -0.329208 -0.484180  
H -3.155947 0.840687 0.162898  
O 3.127869 -1.368156 0.660727  
H 2.879164 -0.670440 1.305219  
H 3.938724 -1.779965 0.984129  
O -2.208395 2.194642 1.126505  
H -2.578278 2.906967 1.661452  
H -1.670475 2.605591 0.417538  
O -0.354866 -0.175196 -1.548679  
H -0.562123 0.776844 -1.511426  
H 0.610647 -0.244827 -1.662141  
O -0.766200 -0.167992 1.581806  
H 0.165650 0.067524 1.746267  
H -1.267528 0.670322 1.635319  
O 2.193788 2.410217 -0.336747  
H 2.868813 3.093949 -0.436326  
H 2.460429 1.664739 -0.925913  
O 0.695908 -2.613712 -0.091910  
H 1.562710 -2.383448 0.296143  
H 0.536081 -3.546841 0.099913  
O 1.969151 0.779699 1.940970  
H 2.156981 1.147891 2.813833  
H 2.089288 1.508068 1.294073  
O -0.519813 2.704806 -1.020331  
H 0.433045 2.807920 -0.815652  
H -0.718284 3.326460 -1.732234

## References

1. N.K. Bersenkovitsch, M. Ončák, J. Heller, C. van der Linde and M.K. Beyer, *Chem. Eur. J.*, 2018, **24**(47), 12433.
2. J. Heller, M. Ončák, N.K. Bersenkovitsch, C. van der Linde and M.K. Beyer, *Eur. J. Mass Spectrom.*, 2019, **25**, 122-132.
